# Supplementary material for: Who will I be when I retire? The role of organizational commitment, group memberships and retirement transition framing on older worker’s anticipated identity change in retirement
Source: Springer Nature journal article supplement (doi:10.1007/s12144-022-02869-7), 2022-02-23
Supplement: MOESM1 [file 12144_2022_2869_MOESM1_ESM.docx]

**Online Supplement**

[Summary of deviations from the pre-registered studies 2](#_Toc93322871)

[Study 1: Results for additional hypotheses 4](#_Toc93322872)

[Study 2: Additional hypothesis tests 8](#_Toc93322873)

[Study 3: Additional hypothesis tests 15](#_Toc93322874)

[Studies 1-3: Work Commitment 21](#_Toc93322875)

[**Study 1 Results** 21](#_Toc93322876)

[**Study 2 Results** 22](#_Toc93322877)

[**Study 3 Results** 26](#_Toc93322878)

[Studies 1 and 3: Exploratory Analysis 28](#_Toc93322879)

[Studies 1-3: Preliminary Analysis Pre-Regression 30](#_Toc93322880)

[Study 1: 30](#_Toc93322881)

[Study 2: 31](#_Toc93322882)

[Study 3: 32](#_Toc93322883)

[References 34](#_Toc93322884)

[Measures used 36](#_Toc93322885)

[Self-Concept Change 36](#_Toc93322886)

[Work Commitment 37](#_Toc93322887)

[Organizational Commitment 38](#_Toc93322888)

[Social Role Identification 38](#_Toc93322889)

[Group Memberships 39](#_Toc93322890)

[Self-esteem 39](#_Toc93322891)

[Self-concept clarity 40](#_Toc93322892)

[Opportunity for Self-Expansion in Retirement 41](#_Toc93322893)

[Framing Condition Manipulation (Study 2) 41](#_Toc93322894)

## Summary of deviations from the pre-registered studies

The following is a summary of deviations from the pre-registered hypotheses. Study data and anonymized versions of the pre-registration for peer review can be found here:

<https://osf.io/edxs9/?view_only=5bfa5bd7e4ce4453b82a08749b21baad>

Our submitted manuscript deviated from the original pre-registration in the following ways:

- We renamed the term ‘self-concept change’ to ‘identity change’ to better describe the measure and avoid confusion with self-concept clarity.
- We did not include a number of pre-registered hypotheses in the submitted manuscript for brevity and focus. Results for all pre-registered hypotheses are outlined in this document.
- In the manuscript we reversed Studies 2 and 3, such that Study 2, which focused on experience of older workers post-retirement became Study 3 and vice-versa. We did this to discuss older workers’ anticipation of change first, and to have the rationale for the second pre-retirement study immediately following the first pre-retirement study.
- Across all three studies, we asked participants to complete a measure of social role identification which we designed specifically for this study (see details below, page 4.). We excluded this from the submitted manuscript because the measure showed a similar pattern of results to / shared variance with group memberships, and unlike group memberships, for which there are a number of published studies (see manuscript), this measure was designed specifically for this study. Results for all pre-registered hypotheses related to social role identification are outlined in this document.
- Study 3 included an additional measure of self-expansion that was not included in the submitted manuscript. Results for all pre-registered hypotheses related to this measure are outlined in this document.
- Study 2 included an additional measure of self-concept clarity that was not included in the submitted manuscript. Results for all pre-registered hypotheses related to this measure are outlined in this document.
- In all three studies, we pre-registered and measured ‘work commitment’ across three distinct constructs, commitment to career, commitment to the organization and commitment to the job (see 2A, Measures Used). This measure was designed specifically for this study using a combination of existing measures. Although the measure achieved a consistent alpha across all three studies, these are conceptually different constructs. The submitted manuscript focuses on organizational commitment, upon which this study was theoretically based. All manuscript results for the pre-registered ‘work commitment’ measure are outlined in this document.

## Study 1: Results for additional hypotheses

In Study 1, we pre-registered five hypotheses in total. Three of these hypotheses were included in the submitted manuscript (Hypothesis 3 and Hypothesis 5, are presented as *Hypothesis 1* and *Hypothesis 2* in the manuscript and Hypothesis 1, is presented in the results but not explicitly identified). We preregistered two more hypotheses for which the results were not reported in the manuscript for brevity and focus on key findings. Here, we present further detail on Hypothesis 1 and present and test preregistered Hypotheses 2 and 4.

Hypothesis 1. On average, participants are predicted to expect more positive (relative to more negative) changes to their self-concept post-retirement.

Hypothesis 2. Participants further from retirement will, a) Report higher levels of work commitment.[[1]](#footnote-1)

Hypothesis 4. Social role identification and organizational commitment will interact to predict anticipated self-concept change following retirement. Participants who report greater importance of non-work social roles will forecast more positive changes to their self-concept upon retirement when low in organizational commitment relative to those with high organizational commitment. No differences in organizational commitment predicting self-concept change are expected to emerge for people low in social role identification.

**Methods:**

In addition to the methods outlined in the manuscript, participants also completed survey measures of work commitment and social role identification immediately prior to group memberships.

***Social Role Identification.***We asked participants to what extent they identified with 11 separate social roles. The 11 social roles were based on a previous study of social roles and self-concept by Light and Visser (2013): spouse or dating partner, parent, grandparent, friend, worker, caregiver, student, volunteer, owner, member of a religious group or denomination, member of a club or social organisation. Participants were asked to indicate how important each role was to their identity on a 7-point Likert scale (1: *not important to my identity at all*; 7: *extremely important to my identity*).

***Work commitment.***Work commitment was measured using adapted scales across three dimensions: career commitment (5 items), organization commitment (8 items) and job commitment (10 items). Participants were asked the extent to which they agreed or disagreed with 23 items in total (1: *strongly disagree*; 7: *strongly agree*). Career commitment was measured using five questions adapted from an organizational commitment scale by Jung & Yoon, 2016, e.g., “I am proud to tell others about my profession”. Organization commitment was measured using eight questions based on the Affective Commitment Scale (Meyer & Allen, 1984), e.g., “My organization’s problems are mine too”. Job commitment was measured using ten questions, based on the Job Involvement Questionnaire (Kanungo, 1982), e.g., “My job is only a small part of who I am”. After reverse coding 6 items, the 23 responses were averaged to compute an overall work commitment score ranging from 1 to 7 with higher scores indicating greater commitment.

**Results:**

To test if older workers expected more positive (relative to more negative) changes to their self-concept post-retirement, we performed a 1-tailed single sample t-test, predicting a self-concept change mean value greater than 0 (“will not change”). Participants did, as hypothesised anticipate more positive (relative to negative) changes to their self-concept post-retirement (M = 0.83, SD = 0.69), *t*(510) = 27.36, *p* < .001.

Next, to test if participants further from retirement a) reported higher levels of work commitment, and b) forecast less positive self-concept change upon retirement, we performed a linear regression predicting a) work commitment, and b) anticipated identity (self-concept) change from years to retirement (Table S1). We found no significant relationship between years to retirement and either work commitment (*b* = .01, *p* = .301) or anticipated identity change in retirement (*b* = .00, *p* = .757).

**Table S1**

*Linear regression analysis on work commitment and anticipated identity (self-concept) change in Study 1 pre-retirement (N=511).*

|  |  | *Work Commitment* | | |  | *Anticipated Identity Change* | |  |
| --- | --- | --- | --- | --- | --- | --- | --- | --- |
| Variable |  | *B* | | *SE B* |  | *B* | *SE B* |  |
| Intercept |  | 4.41*** | | .05 |  | .83*** | .03 |  |
| Years to retirement |  | .01 | | .01 |  | .00 | .01 |  |
|  |  |  | | |  |  | |  |
| *R*2 |  | .00 | | |  | .00 | |  |
| F for Δ*R*2 |  | 1.07 | | |  | 0.10 | |  |
| *Note. ***p < .001, **p <.01, *p <.05, ^p <.10* |  | |

To test the interaction between social role identification and organizational commitment in predicting anticipated self-concept change following retirement, we performed a linear regression predicting anticipated identity (self-concept) change from the interaction between social role identification and organizational commitment (Table S2, Step 2). We found a significant positive main effect of social role identification, such that older workers with who had stronger identification with (non-work) roles anticipated more positive changes to their identity in retirement (*b* = .16, *p* < .001). However, contrary to hypothesis, the two-way organizational commitment by social role identification interaction was not significant (*b* = .02, *p* = .321). We did not find any significant changes to these hypothesised effects after we entered demographic variables and self-esteem (Step 3).

**Table S2**

*Multiple linear regression analysis on anticipated identity change in Study 1 pre-retirement (N = 511).*

|  |  | *Step 1* | | |  | *Step 2* | |  | *Step 3* | |
| --- | --- | --- | --- | --- | --- | --- | --- | --- | --- | --- |
| Variable |  | *B* | | *SE B* |  | *B* | *SE B* |  | *B* | *SE B* |
| Intercept |  | .83*** | | .03 |  | .83*** | .03 |  | .85*** | .05 |
| Org commitment |  | .03 | | .02 |  | -.01 | .02 |  | -.01 | .02 |
| Social role identification |  |  | |  |  | .16*** | .03 |  | .15*** | .03 |
| Org commitment × Social role identification |  |  | |  |  | .02 | .02 |  | .02 | .02 |
| Education level |  |  | |  |  |  |  |  | .04^ | .02 |
| Household income |  |  | |  |  |  |  |  | .01 | .01 |
| Gender |  |  | |  |  |  |  |  | -.02 | .06 |
| Years to / from retirement |  |  | |  |  |  |  |  | .00 | .01 |
| Self-esteem |  |  | |  |  |  |  |  | .07* | .03 |
|  |  |  | | |  |  | |  |  | |
| *R*2 |  | .01 | | |  | .07 | |  | .08 | |
| F for Δ*R*2 |  | 4.39* | | |  | 15.58*** | |  | 9.67^ | |
| *Note. ***p < .001, **p <.01, *p <.05* |  | |

## Study 2: Additional hypothesis tests

In Study 2, we introduced a measure of anticipated self-expansion in retirement. Self-expansion is defined as positive changes to the self-concept that lead to increased abilities, perspectives and feelings of competency (Aron & Aron, 1997). Studies have found greater work satisfaction and commitment in those who consider their work to be self-expanding (McIntyre, Mattingly, Lewandowski & Simpson, 2014), we expected higher organizational commitment might be associated with lower perceived opportunity for self-expansion in retirement. A similar pattern of results was found with anticipated identity (self-concept) change used in Study 1, thus the results were not included in the submitted manuscript.

In Study 2, we pre-registered four hypotheses in total. All of these hypotheses were included in the submitted manuscript and tested for self-concept change but results for self-expansion were not included. Hypothesis 1 was included as the manipulation check for dependent variable anticipated identity (self-concept) change. Hypotheses 2(ii) and 3(ii) were presented together in Hypothesis 3. Hypothesis 4(ii) was presented as Hypothesis 4. Here, we present and test preregistered Hypotheses 1 to 4 using measures of social role identification and self-expansion.

Hypothesis 1. Participants in the exit role framing condition will forecast less self-expansion following retirement than those in the entry role framing condition.

Hypothesis 2. Participants with higher social role identification & more social group memberships pre-retirement will forecast more positive self-concept change and greater self-expansion following retirement in both framing conditions.

Hypothesis 3. We expect a simple effect of organizational commitment for participants in the exit framing condition such that participants who report being more committed to their organization will forecast less opportunity for self-expansion in retirement. The simple effect of organizational commitment is not expected to be significant in the entry framing condition.

Hypothesis 4. We expect a significant simple effect of (i) social role identification & (ii) social group membership in the exit framing condition, such that people with greater (i) social role identification & (ii) more social group memberships will predict more positive anticipated self-concept change and greater anticipated opportunity for self-expansion in retirement when high in organizational commitment, compared to those with lower (i) social role identification & (ii) fewer social group memberships. The simple effect of (i) social role identification & (ii) social group membership is not expected to be significant for those with low organizational commitment in the exit framing condition. No significant (i) social role identification & (ii) social group membership by organizational commitment interaction predicting anticipated self-concept change and self-expansion in retirement is expected in the entry framing condition.

**Methods note:**

In addition to the methods outlined in the manuscript, participants completed the survey measure of social role identification (see Study 1 above, again immediately prior to group memberships). Participants also completed the measure of anticipated self-expansion in retirement immediately prior to anticipated identity (self-concept) change. After completing the manipulation, we asked participants complete a single-item response measure to report to what extent they perceived retirement as an entry vs. exit. No hypotheses were pre-registered for this measure.

***Opportunity for self-expansion in retirement.*** Participants completed a 14-item scale (based on ﻿McIntyre et al., 2014) measuring perceived opportunity for self-expansion in retirement (e.g., ﻿“Retirement will expand your sense of the kind of person you are”; 1: *not very much*; 7: *very much*). Items were then averaged to create an overall measure of perceived opportunity for self-expansion in retirement, with higher scores indicating greater anticipated opportunity for self-expansion (Cronbach’s α = .93).

***Perception of entry vs. exit.*** After completing the framing manipulation, participants completed a single-item measure in response to the question “When you think about your transition into retirement, do you consider it to be more of an exit from your current role as a worker or an entry into a new role as a retiree ?; 1: *Primarily an exit*; 7: *Primarily an entry*”(*M* = 4.73, *SD* = 2.06).

**Results:**

In Study 2, we pre-registered four hypotheses in total. All of these hypotheses were included in the submitted manuscript. Hypothesis 1 was included as the manipulation check for dependent variable anticipated identity (self-concept) change. Hypotheses 2(ii) and 3(ii) were presented together in Hypothesis 3. Hypothesis 4(ii) was presented as Hypothesis 4. Further analysis responding to the original hypotheses is below.

First, to test if participants in the exit role framing condition anticipated opportunity for self-expansion following retirement than those in the entry role framing condition, we ran an independent samples *t*-test. This confirmed that participants in the exit condition anticipated less opportunity for self-expansion (*M* = 4.34, *SD* = 1.21) than those in the entry condition (*M* = 4.93, *SD* = 1.01; *t*(546) = 6.16, *p* < .001; *d =* 0.53). This result is consistent with the results for anticipated identity (self-concept) change presented in the manuscript.

Next, to test if participants with (i) higher social role identification & (ii) more social group memberships pre-retirement forecast more positive self-concept change and greater self-expansion following retirement in both framing conditions, we performed a linear regression predicting anticipated identity (self-concept) change and perceived opportunity for self-expansion from (i) social role identification (Table S3) and (ii) group memberships (Table S4). As hypothesized, participants with higher social role identification anticipated more positive identity change (*b* = .13, *p* < .001) and greater self-expansion (*b* = .21, *p* < .001) in retirement. Similarly, participants with more group memberships anticipated more positive identity (self-concept) change (*b* = .05, *p* = .001) and greater self-expansion (*b* = .08, *p* < .001) in retirement.

**Table S3**

*Linear regression analysis on anticipated self-concept (identity) change and opportunity for self-expansion in Study 2 pre-retirement (N=548).*

|  |  | *Anticipated Identity Change* | | |  | *Opportunity for Self-Expansion* | |  |
| --- | --- | --- | --- | --- | --- | --- | --- | --- |
| Variable |  | *B* | | *SE B* |  | *B* | *SE B* |  |
| Social role identification |  | .13*** | | .03 |  | .21*** | .04 |  |
|  |  |  | | |  |  | |  |
| *Note. ***p < .001, **p <.01, *p <.05, ^p <.10* |  | |

**Table S4**

*Linear regression analysis on anticipated self-concept (identity) change and opportunity for self-expansion in Study 2 pre-retirement (N=548).*

|  |  | *Anticipated Identity Change* | | |  | *Opportunity for Self-Expansion* | |  |
| --- | --- | --- | --- | --- | --- | --- | --- | --- |
| Variable |  | *B* | | *SE B* |  | *B* | *SE B* |  |
| Group memberships |  | .05** | | .01 |  | .08*** | .02 |  |
|  |  |  | | |  |  | |  |
| *Note. ***p < .001, **p <.01, *p <.05, ^p <.10* |  | |

To test if there was an interaction between framing condition and organizational commitment predicting self-expansion, we ran a linear regression predicting self-expansion from the interaction between framing condition and work commitment (Table S5, Step 1). Contrary to hypothesis (and consistent with our null finding for anticipated identity change in the submitted manuscript), we did not find a signification two-way interaction between framing condition and organizational commitment (*b* = -.03, *p* = .669).

**Table S5**

*Multiple linear regression analysis on opportunity for self-expansion in Study 2 pre-retirement with framing (N= 548)*

|  |  | *Step 1* | | |  | *Step 2* | |  | *Step 3* | |
| --- | --- | --- | --- | --- | --- | --- | --- | --- | --- | --- |
| Variable |  | *B* | | *SE B* |  | *B* | *SE B* |  | *B* | *SE B* |
| Intercept |  | 4.35*** | | .07 |  | 4.37*** | .07 |  | 4.51*** | .10 |
| Condition (entry / exit) |  | .58*** | | .10 |  | .55*** | .10 |  | .53*** | .09 |
| Org commitment |  | .11* | | .05 |  | .06 | .05 |  | .07 | .06 |
| Social role identification |  |  | |  |  | .20** | .06 |  | .17** | .06 |
| Condition × Org commitment |  | -.03 | | .07 |  | -.00 | .07 |  | -.01 | .08 |
| Condition × Social role identification |  |  | |  |  | -.01 | .09 |  | -.01 | .08 |
| Org commitment × Social role identification |  |  | |  |  | -.07 | .04 |  | -.06 | .04 |
| Condition × Org commitment × Social role identification |  |  | |  |  | .07 | .06 |  | .10 | .07 |
| Education level |  |  | |  |  |  |  |  | -.01 | .03 |
| Household income |  |  | |  |  |  |  |  | -.01 | .02 |
| Gender |  |  | |  |  |  |  |  | -.18^ | .10 |
| Years to / from retirement |  |  | |  |  |  |  |  | -.04*** | .01 |
| Self-esteem |  |  | |  |  |  |  |  | .17*** | .04 |
|  |  |  | | |  |  | |  |  | |
| *R*2 |  | .07 | | |  | .11 | |  | .19 | |
| F for Δ*R*2 |  | 15.48*** | | |  | 6.29*** | |  | 11.07*** | |
| *Note. ***p < .001, **p <.01, *p <.05* |  | |

We next tested the interactions between social role identification, organizational commitment and framing condition predicting anticipated self-concept change and self-expansion in retirement and, between social group memberships, organizational commitment and framing condition predicting anticipated self-expansion in retirement. To test anticipated identity (self-concept) change from the three-way interaction between organizational commitment, social role identification and entry/exit framing condition, we ran a linear regression as per our pre-registration (Table S6, Step 2). Contrary to hypothesis, we did not find a significant three-way interaction between framing condition, organizational commitment and social role identification predicting anticipated identity changes (*b* = .01, *p* = .757). Nor did we find any significant changes to these hypothesised effects after we entered demographic variables and self-esteem (Step 3).

**Table S6**

*Multiple linear regression analysis on anticipated identity change in Study 2 pre-retirement with framing (N= 548)*

|  |  | *Step 1* | | |  | *Step 2* | |  | *Step 3* | |
| --- | --- | --- | --- | --- | --- | --- | --- | --- | --- | --- |
| Variable |  | *B* | | *SE B* |  | *B* | *SE B* |  | *B* | *SE B* |
| Intercept |  | .64*** | | .04 |  | .64*** | .04 |  | .62*** | .03 |
| Condition (entry / exit) |  | .36*** | | .06 |  | .36*** | .06 |  | .35*** | .06 |
| Org commitment |  | .05 | | .03 |  | .00 | .03 |  | -.03 | .03 |
| Social role identification |  |  | |  |  | .18*** | .04 |  | .15*** | .04 |
| Condition × Org commitment |  | .03 | | .05 |  | .06 | .04 |  | .06 | .05 |
| Condition × Social role identification |  |  | |  |  | -.13* | .06 |  | -.10^ | .06 |
| Org commitment × Social role identification |  |  | |  |  | -.02 | .03 |  | -.02 | .02 |
| Condition × Org commitment × Social role identification |  |  | |  |  | .01 | .04 |  | .00 | .04 |
| Education level |  |  | |  |  |  |  |  | .01 | .02 |
| Household income |  |  | |  |  |  |  |  | -.01 | .01 |
| Gender |  |  | |  |  |  |  |  | .04 | .07 |
| Years to / from retirement |  |  | |  |  |  |  |  | -.01* | .01 |
| Self-esteem |  |  | |  |  |  |  |  | .16*** | .03 |
|  |  |  | | |  |  | |  |  | |
| *R*2 |  | .07 | | |  | .11 | |  | .16 | |
| F for Δ*R*2 |  | 14.15*** | | |  | 6.22*** | |  | 8.35*** | |
| *Note. ***p < .001, **p <.01, *p <.05* |  | |

Next, we ran a linear regression predicting self-expansion in retirement from the three-way interaction between organizational commitment, social role identification and entry/exit framing condition, (Table S5, Step 2). Contrary to hypothesis, we did not find a significant three-way interaction between framing condition, organization commitment and social role identification (*b* = .07, *p* = .227). We did not find any significant changes to these hypothesised effects after we entered demographic variables and self-esteem (Step 3).

To test Hypothesis 4(ii) predicting perceived opportunity for self-expansion in retirement from the three-way interaction between framing condition, organizational commitment and group memberships, we ran a linear regression as per our pre-registration (Table S7, Step 2[[2]](#footnote-2)). Contrary to hypothesis, we did not find a significant three-way interaction between framing condition, organizational commitment and group memberships predicting perceived opportunity for self-expansion in retirement (*b* = -.01, *p* = .894). Nor did we find any significant changes to these hypothesised effects after we entered demographic variables and self-esteem (Step 3).

**Table S7**

*Multiple linear regression analysis on opportunity for self-expansion in Study 2 pre-retirement with framing (N= 548)*

|  |  | *Step 1* | | |  | *Step 2* | |  | *Step 3* | |
| --- | --- | --- | --- | --- | --- | --- | --- | --- | --- | --- |
| Variable |  | *B* | | *SE B* |  | *B* | *SE B* |  | *B* | *SE B* |
| Intercept |  | 4.35*** | | .07 |  | 4.37*** | .07 |  | 4.47*** | .10 |
| Condition (entry / exit) |  | .58*** | | .10 |  | .57*** | .10 |  | .55*** | .09 |
| Org commitment |  | .11* | | .05 |  | .08^ | .05 |  | .04 | .05 |
| Group memberships |  |  | |  |  | .05^ | .03 |  | .05 | .03 |
| Condition × Org commitment |  | -.03 | | .07 |  | -.06 | .07 |  | -.05 | .09 |
| Condition × Group memberships |  |  | |  |  | .03 | .05 |  | .03 | .04 |
| Org commitment × Group memberships |  |  | |  |  | -.02 | .02 |  | -.02 | .04 |
| Condition × Org commitment × Group memberships |  |  | |  |  | -.01 | .03 |  | .00 | .03 |
| Education level |  |  | |  |  |  |  |  | -.04 | .04 |
| Household income |  |  | |  |  |  |  |  | -.00 | .02 |
| Gender |  |  | |  |  |  |  |  | -.14 | .10 |
| Years to / from retirement |  |  | |  |  |  |  |  | -.04*** | .01 |
| Self-esteem |  |  | |  |  |  |  |  | .21*** | .04 |
|  |  |  | | |  |  | |  |  | |
| *R*2 |  | .08 | | |  | .10 | |  | .19 | |
| F for Δ*R*2 |  | 15.47*** | | |  | 3.00* | |  | 11.29*** | |
| *Note. ***p < .001, **p <.01, *p <.05* |  | |

## Study 3: Additional hypothesis tests

In Study 3, we introduced a measure of self-concept clarity, the extent to which a person’s self-concept is clearly defined, consistent and stable (Campbell et al., 1996). Previous studies have shown that life transitions, including loss of meaningful work, can lead to lower self-concept clarity (e.g. Light & Visser, 2013; McIntyre et al., 2014), especially if commitment is high prior to the source of meaning being lost (Slotter, Gardner, & Finkel, 2010; Slotter, Winger, & Soto, 2015). Thus, we expected retirees who reported higher organizational commitment prior to retirement to be lower in self-concept clarity. Our results did not show any significant associations between our pre-registered, hypothesised variables and self-concept clarity. Given this dependent measure was not used in our pre-retirement studies, we excluded these results from the submitted manuscript.

In Study 3, we pre-registered five hypotheses in total. *Hypothesis 1(a)* and *Hypothesis 5(a)* were included in the submitted manuscript, as these mirror Hypotheses 1 and 2 from Study 1 in the manuscript. Hypothesis 3(a) was also tested as part of the analysis for Hypothesis 5(a). These hypotheses were included in the submitted manuscript and tested for self-concept change but results for self-concept clarity were not included. Here, we present and test preregistered Hypotheses 1(b), 2, 3(b), 4 and 5(b) using the measures of self-concept clarity and social role identification excluded from the manuscript.

Hypothesis 1. Participants who retrospectively report being more committed to their organization prior to retirement will report b. lower self-concept clarity

Hypothesis 2. Participants with higher social role identification post retirement will report: a. more positive self-concept change following retirement, b. higher self-concept clarity

Hypothesis 3. Participants with more group memberships post retirement will report b. higher self-concept clarity.

Hypothesis 4. The impact of retrospectively reported pre-retirement organizational commitment on self-concept will be moderated by social role identification. Specifically, participants who report being more committed to their organization prior to retirement, but also report greater identification with social roles will report: a. more positive self-concept change following retirement, b. higher self-concept clarity. No differences in self-concept change or clarity are expected for those who retrospectively report low organizational commitment prior based on identification with social roles.

Hypothesis 5. The impact of retrospectively reported pre-retirement organizational commitment on self-concept change in retirement will be moderated by the number of group memberships a person holds post-retirement. Participants who report high organizational commitment prior to retirement and report affiliation with a greater number of non-work groups will report, b. higher self-concept clarity. No differences in clarity are expected for participants who retrospectively report low work commitment based on post-retirement group memberships.

**Methods note:**

In addition to the methods outlined in the manuscript, eligible participants completed a measure of self-concept clarity after self-concept change. Additionally, as all participants were no longer working, the social role ‘worker’was removed from the social role identification scale (see above).

***Self-concept clarity.*** 12-item scale (based on ﻿Campbell et al., 1996) used to measure self-concept clarity (e.g., ﻿“In general, I have a clear sense of who I am and what I am”; 1: *strongly disagree*; 7: *strongly agree*). Ten items were reverse scored and averaged to create an overall measure of self-concept clarity with higher scores indicating greater self-concept clarity (Cronbach’s α = .93).

**Results:**

To test if participants who retrospectively report being more committed to their organization prior to retirement reported lower self-concept clarity, we ran a linear regression. Retirees more committed to their work did not report lower self-concept clarity (Table S8, Step 1), *b = .*01, *p =* .937.

**Table S8**

*Multiple linear regression analysis on self-concept clarity in Study 3 post-retirement (N = 215).*

|  |  | *Step 1* | | |  | *Step 2* | |  | *Step 3* | |
| --- | --- | --- | --- | --- | --- | --- | --- | --- | --- | --- |
| Variable |  | *B* | | *SE B* |  | *B* | *SE B* |  | *B* | *SE B* |
| Intercept |  | 5.21*** | | .09 |  | 5.20*** | .09 |  | 5.21*** | .07 |
| Org commitment |  | .01 | | .08 |  | .02 | .09 |  | -.05 | .07 |
| Group memberships |  |  | |  |  | .06 | .05 |  | .01 | .04 |
| Org commitment × Group memberships |  |  | |  |  | .05 | .05 |  | .01 | .04 |
| Education level |  |  | |  |  |  |  |  | .02 | .05 |
| Household income |  |  | |  |  |  |  |  | -.00 | .03 |
| Gender |  |  | |  |  |  |  |  | .06 | .15 |
| Years to / from retirement |  |  | |  |  |  |  |  | -.01 | .02 |
| Self-esteem |  |  | |  |  |  |  |  | .72*** | .06 |
|  |  |  | | |  |  | |  |  | |
| *R*2 |  | .00 | | |  | .02 | |  | .40 | |
| F for Δ*R*2 |  | 0.01 | | |  | 1.60 | |  | 26.94*** | |
| *Note. ***p < .001, **p <.01, *p <.05, ^p <.10* |  | |

Next, we tested if participants with higher social role identification post retirement reported: a. more positive self-concept change following retirement and b. higher self-concept clarity using a linear regression (Table S9). We found that, as hypothesized, participants with higher social role identification experienced more positive identity (self-concept) change (*b* = .15, *p* = .001). However, there was no significant association between social role identification and self-concept clarity (*b* = .04, *p* = .587) in retirement.

**Table S9**

*Linear regression analysis on experienced identity (self-concept) change and self-concept clarity in Study 3 post-retirement (N=215).*

|  |  | *Experienced Identity Change* | | |  | *Self-Concept Clarity* | |  |
| --- | --- | --- | --- | --- | --- | --- | --- | --- |
| Variable |  | *B* | | *SE B* |  | *B* | *SE B* |  |
| Social role identification |  | .15** | | .05 |  | .04 | .08 |  |
|  |  |  | | |  |  | |  |
| *Note. ***p < .001, **p <.01, *p <.05, ^p <.10* |  | |

We next tested if participants with more group memberships post retirement would report
a. more positive self-concept change following retirement, b. higher self-concept clarity. We ran a linear regression (Table S10) and found that, as hypothesized, participants with more group memberships experienced more positive identity (self-concept) change (*b* = .12, *p* < .001). This result is also reflected in the main manuscript, albeit with controls. No significant association was found between group memberships and self-concept clarity in retirement (*b* = .06, *p* = .168).

**Table S10**

*Linear regression analysis on experienced identity (self-concept) change and self-concept clarity in Study 3 post-retirement (N=215).*

|  |  | *Experienced Identity Change* | | |  | *Self-Concept Clarity* | |  |
| --- | --- | --- | --- | --- | --- | --- | --- | --- |
| Variable |  | *B* | | *SE B* |  | *B* | *SE B* |  |
| Group memberships |  | .12*** | | .03 |  | .06 | .05 |  |
|  |  |  | | |  |  | |  |
| *Note. ***p < .001, **p <.01, *p <.05, ^p <.10* |  | |

We next set out to test the interaction between self-concept measures and social role identification. To do this, we performed a linear regression predicting self-concept change from the interaction between social role identification and organizational commitment (Table S11, Step 2[[3]](#footnote-3)). Contrary to hypothesis, the 2-way work commitment by social role identification interaction was not significant (*b* = -.02, *p* = .558), nor did we find any significant changes to these hypothesised effects after we entered demographic variables and self-esteem (Step 3).

**Table S11**

*Multiple linear regression analysis on experienced identity (self-concept) change in Study 3 post-retirement (N = 215).*

|  | *Step 1* | |  | | *Step 2* | | |  | | *Step 3* | | |
| --- | --- | --- | --- | --- | --- | --- | --- | --- | --- | --- | --- | --- |
| Variable | *B* | *SE B* | |  | | *B* | *SE B* | |  | | *B* | *SE B* | |
| Intercept | .50*** | .05 | |  | | .41*** | .09 | |  | | .41*** | .09 | |
| Org commitment | .04 | .04 | |  | | .00 | .05 | |  | | -.03 | .04 | |
| Social role identification |  |  | |  | | .15** | .05 | |  | | .13** | .05 | |
| Org commitment × Social role identification |  |  | |  | | -.02 | .04 | |  | | -.03 | .04 | |
| Education level |  |  | |  | |  |  | |  | | .01 | .04 | |
| Household income |  |  | |  | |  |  | |  | | .01 | .02 | |
| Gender |  |  | |  | |  |  | |  | | .15 | .11 | |
| Years since retirement |  |  | |  | |  |  | |  | | -.01 | .01 | |
| Self-esteem |  |  | |  | |  |  | |  | | .24** | .05 | |
|  |  | |  | |  | | |  | |  | | |
| *R*2 | .01 | |  | | .05 | | |  | | .15 | | |
| F for Δ*R*2 | 0.98 | |  | | 5.00** | | |  | | 6.37*** | | |
| *Note. ***p < .001, **p <.01, *p <.05, ^p <.10* |

Next, we performed a linear regression predicting self-concept clarity from the two-way interaction between social role identification and work commitment (Table S12, Step 2). Contrary to hypothesis, the two-way organizational commitment by social role identification interaction was not significant (*b* = .07, *p* = .285), and this did not change after we entered demographic variables and self-esteem (Step 3).

**Table S12**

*Multiple linear regression analysis on self-concept clarity in Study 3 post-retirement (N = 215).*

|  | *Step 1* | |  | | *Step 2* | | |  | | *Step 3* | | |
| --- | --- | --- | --- | --- | --- | --- | --- | --- | --- | --- | --- | --- |
| Variable | *B* | *SE B* | |  | | *B* | *SE B* | |  | | *B* | *SE B* | |
| Intercept | 5.21*** | .09 | |  | | 5.18*** | .13 | |  | | 5.17*** | .07 | |
| Org commitment | .13^ | .07 | |  | | -.15* | .08 | |  | | -.06 | .06 | |
| Social role identification |  |  | |  | | .00 | .08 | |  | | -.02 | .06 | |
| Org commitment × Social role identification |  |  | |  | | -.07 | .06 | |  | | -.02 | .05 | |
| Education level |  |  | |  | |  |  | |  | | .03 | .05 | |
| Household income |  |  | |  | |  |  | |  | | -.00 | .03 | |
| Gender |  |  | |  | |  |  | |  | | .05 | .15 | |
| Years since retirement |  |  | |  | |  |  | |  | | -.01 | .01 | |
| Self-esteem |  |  | |  | |  |  | |  | | .71*** | .06 | |
|  |  | |  | |  | | |  | |  | | |
| *R*2 | .02^ | |  | | .02 | | |  | | .41 | | |
| F for Δ*R*2 | 3.63 | |  | | 0.57 | | |  | | 26.55*** | | |
| *Note. ***p < .001, **p <.01, *p <.05, ^p <.10* |

Finally, we tested interaction between pre-retirement work commitment and social group memberships on self-concept clarity in retirement (Table S13). We ran a linear regression to test this interaction, however no significant association was found (*b = .*05, *p =* .149) , and this did not change after we entered demographic variables and self-esteem (Step 3).

**Table S13**

*Multiple linear regression analysis on self-concept clarity in Study 3 post-retirement (N = 215).*

|  | *Step 1* | |  | | *Step 2* | | |  | | *Step 3* | | |
| --- | --- | --- | --- | --- | --- | --- | --- | --- | --- | --- | --- | --- |
| Variable | *B* | *SE B* | |  | | *B* | *SE B* | |  | | *B* | *SE B* | |
| Intercept | 5.21*** | .09 | |  | | 5.19*** | .09 | |  | | 5.17*** | .07 | |
| Org commitment | .13^ | .07 | |  | | -.14^ | .07 | |  | | -.06 | .06 | |
| Group memberships |  |  | |  | | .05 | .05 | |  | | -.02 | .06 | |
| Org commitment × Group memberships |  |  | |  | | .05 | .04 | |  | | -.02 | .05 | |
| Education level |  |  | |  | |  |  | |  | | .03 | .05 | |
| Household income |  |  | |  | |  |  | |  | | -.01 | .03 | |
| Gender |  |  | |  | |  |  | |  | | .05 | .15 | |
| Years since retirement |  |  | |  | |  |  | |  | | -.01 | .01 | |
| Self-esteem |  |  | |  | |  |  | |  | | .71*** | .06 | |
|  |  | |  | |  | | |  | |  | | |
| *R*2 | .02^ | |  | | .02 | | |  | | .41 | | |
| F for Δ*R*2 | 3.63 | |  | | 0.57 | | |  | | 26.55*** | | |
| *Note. ***p < .001, **p <.01, *p <.05, ^p <.10* |

## Studies 1-3: Work Commitment

In all three studies, we pre-registered and measured ‘work commitment’ across three distinct constructs, commitment to career, commitment to the organization and commitment to the job (see 2A, Measures Used). As these are conceptually different constructs, the submitted manuscript has focused on organizational commitment, for which the study was theoretically grounded. Results for the pre-registered ‘work commitment’ combined measure are outlined below.

### **Study 1 Results**

We hypothesized that older workers with higher work commitment would anticipate less positive change to their identity following retirement than those less committed to work. Contrary to hypothesis, the first step in our regression analysis (Table S14, Step 1) showed the opposite association, with those more committed to their work anticipating more (rather than less) positive identity changes in retirement (*b* = .05, *p* = .037). Next, we tested the hypothesis that group membership would moderate the association between work commitment and anticipated identity changes (Table S14, Step 2). We found a significant positive main effect of group memberships, such that older workers with more group memberships anticipated more positive changes to their identity in retirement (*b* = .06, *p* < .001). However, contrary to our second hypothesis, the 2-way group membership by work commitment interaction was not significant (*b* = -.00, *p* = .916). Further, when we added group memberships and the interaction term to the regression analysis, work commitment was no longer significantly associated with anticipated identity change in retirement (*b* = .03, *p* = .221). In the final step of our analysis (Table S14, Step 3), we added demographic factors shown to influence wellbeing post-retirement and self-esteem. Self-esteem was a significant predictor of anticipated identity change in retirement (*b* = .06, *p* = .033), but group memberships remained significantly associated with anticipated identity change.

**Table S14**

*Multiple regression analysis on anticipated identity change in Study 1 pre-retirement (N = 511)*

|  |  | *Step 1* | |  | *Step 2* | |  | *Step 3* | |
| --- | --- | --- | --- | --- | --- | --- | --- | --- | --- |
| Variable |  | *B* | *SE B* |  | *B* | *SE B* |  | *B* | *SE B* |
| Intercept |  | .83*** | .03 |  | .83*** | .03 |  | .84*** | .03 |
| Work commitment |  | .05* | .02 |  | .03 | .03 |  | .01 | .03 |
| Group memberships |  |  |  |  | .06*** | .01 |  | .05*** | .02 |
| Work commitment × Group memberships |  |  |  |  | -.00 | .01 |  | .00 | .01 |
| Education level |  |  |  |  |  |  |  | .01 | .02 |
| Household income |  |  |  |  |  |  |  | .01 | .01 |
| Gender |  |  |  |  |  |  |  | -.02 | .06 |
| Years to retirement |  |  |  |  |  |  |  | -.00 | .01 |
| Self-esteem |  |  |  |  |  |  |  | .06* | .03 |
|  |  |  | |  |  | |  |  | |
| *R*2 |  | .01 | |  | .04 | |  | .05 | |
| F for Δ*R*2 |  | 4.39* | |  | 8.39*** | |  | 1.43 | |
| *Note. ***p < .001, **p <.01, *p <.05* |  | | | | | | | | |

### **Study 2 Results**

We hypothesized that in the work exit condition, more committed older workers would anticipate less positive change to their identity following retirement than those less committed. Contrary to Hypothesis 4, the first step in our analysis (Table S15, Step 1) showed no significant interaction between work commitment and framing condition (*b* = .05, *p* = .381).

We next set out to test the hypothesis that older workers with more group memberships would anticipate more positive identity changes when high in work commitment, compared to those with fewer group memberships in the work exit condition (Table S15, Step 2). Regression analysis revealed a significant three-way interaction between framing condition, work commitment and group memberships predicting anticipated identity change (*b* = .10, *p* < .001). We hypothesized that people higher in work commitment and more social groups would anticipate more positive identity changes in the exit-framing condition. To test this hypothesis, we first decomposed the 3-way interaction to test whether the 2-way work commitment by group membership interaction was significant for people in the exit and entry framing conditions (Figure S1). The interaction between group memberships and work-commitment was significant in both framing conditions, when retirement was framed as a work exit (*b* = -.06, *p* = .003) and retirement entry (*b* = .04, *p* = .034). To test for the hypothesized simple effect of group membership we further decomposed the 2-way interactions for people high (+1SD) and low (+1SD) in work commitment. Contrary to our hypothesis, in the work exit condition, older workers higher in work commitment did not anticipate more positive identity changes in retirement when they belonged to more, relative to fewer social groups (*b* = -.03, *p* = .360). However, the simple effect of group membership was significant for less committed workers (*b* = .10, *p* < .001), such that less committed workers in the exit framing condition reported more positive anticipated changes to their identity in retirement when they belonged to more relative to fewer social groups.

Furthermore, because the 2-way interaction between work commitment and group membership was also significant in the entry-role, we tested the simple effect of group membership for those high and low in work commitment. This revealed that the simple effect of group membership was significant for more committed workers in the entry role condition, such that those with more group memberships anticipated more positive identity changes than those with fewer group memberships (*b* = .05, *p* = .020). The simple effect of group membership was not significant for less committed workers in the entry-framing condition (*b* = -.03, *p* = .362). In the final step of our analysis (Table S14, Step 3), we added demographic factors and self-esteem to test for the robustness of our effects. While self-esteem was again a significant predictor of anticipated identity change in retirement (*b* = .17, *p* < .001), with older workers with higher self-esteem anticipating more positive identity changes, the three-way interaction between condition, work commitment and group memberships remained significant (*b* = .09, *p* < .001).

**Table S14**

*Multiple linear regression analysis on anticipated identity change in Study 2 pre-retirement with framing condition (N= 548)*

|  | *Step 1* | |  | *Step 2* | |  | *Step 3* | |
| --- | --- | --- | --- | --- | --- | --- | --- | --- |
| Variable | *B* | *SE B* |  | *B* | *SE B* |  | *B* | *SE B* |
| Intercept | .83*** | .03 |  | .82*** | .03 |  | .82*** | .03 |
| Framing Condition (entry / exit) | .36*** | .06 |  | .28*** | .07 |  | .27*** | .06 |
| Work commitment | .05 | .04 |  | .01 | .04 |  | -.04 | .04 |
| Group memberships |  |  |  | .04^ | .02 |  | .03 | .02 |
| Condition × Work commitment | .05 | .06 |  | .09 | .06 |  | .10^ | .06 |
| Condition × Group memberships |  |  |  | -.03 | .03 |  | -.02 | .03 |
| Work commitment × Group memberships |  |  |  | -.06** | .02 |  | -.05** | .02 |
| Condition × Work commitment × Group memberships |  |  |  | .10*** | .03 |  | .09*** | .03 |
| Education level |  |  |  |  |  |  | -.02 | .02 |
| Household income |  |  |  |  |  |  | -.01 | .01 |
| Gender |  |  |  |  |  |  | .06 | .07 |
| Years to retirement |  |  |  |  |  |  | -.01* | .01 |
| Self-esteem |  |  |  |  |  |  | .17*** | .03 |
|  |  | |  |  | |  |  | |
| *R*2 | .08 | |  | .11 | |  | .18 | |
| F for Δ*R*2 | 14.7*** | |  | 4.87** | |  | 9.67*** | |
| *Note. ***p < .001, **p <.01, *p <.05* |

**Figure S1.**

*Interaction between framing condition, work commitment, group memberships predicts anticipated changes to identity in retirement (high and low values of work commitment and group memberships represented at ±1 SD).*


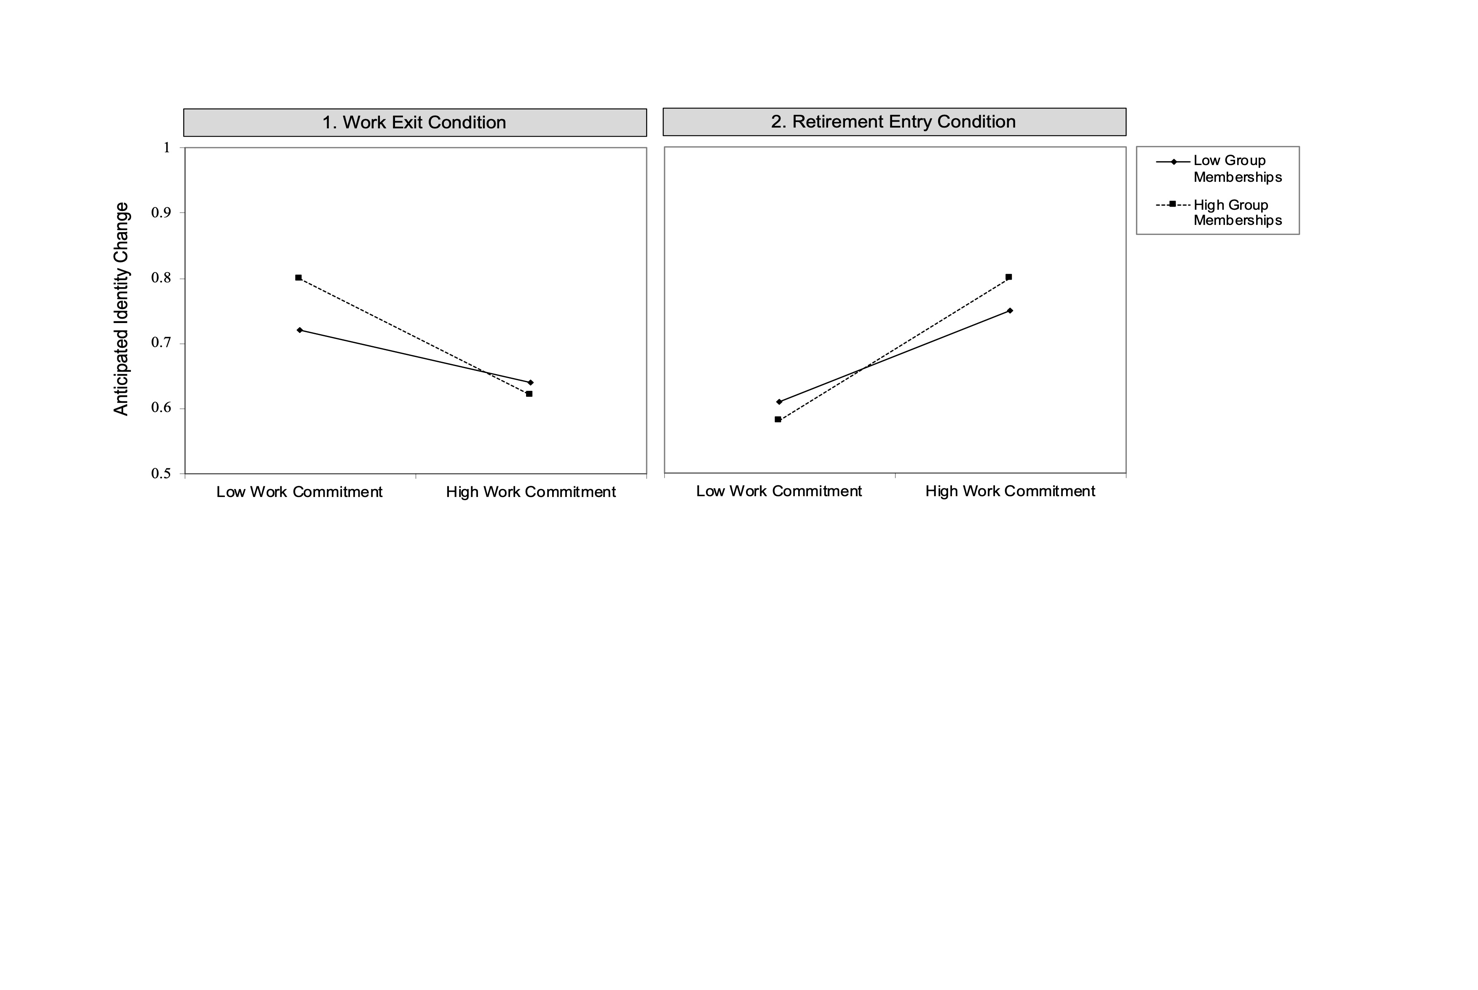


### **Study 3 Results**

Study 3 results did not support our hypothesis that retirees who were more committed to their work prior to retirement would report experiencing less positive identity changes after leaving the workforce. Our regression analysis (Table S15, Step 1) showed no significant association between prior work commitment and identity changes experienced in retirement (*b* = -.01, *p* = .797). In step two of our analysis, we entered group memberships together with its hypothesized interaction with work commitment (Table S15, Step 2). Consistent with our results from Study 1, retirees with more group memberships reported experiencing significantly more positive identity changes in retirement (*b* = .12, *p* < .001), but the interaction was not significant (*b* = .00, *p* = .895). In the final step of our analysis (Table S15, Step 3), we added demographic factors and self-esteem. While self-esteem was a significant predictor of identity change experienced post-retirement (*b* = .24, *p* < .001), the effect of group membership on experienced identity change remained significant.

**Table S15**

*Multiple regression on experienced identity change in Study 3 post-retirement (N = 215).*

|  |  | *Step 1* | |  | *Step 2* | |  | *Step 3* | |
| --- | --- | --- | --- | --- | --- | --- | --- | --- | --- |
| Variable |  | *B* | *SE B* |  | *B* | *SE B* |  | *B* | *SE B* |
| Intercept |  | .50*** | .05 |  | .50*** | .05 |  | .50*** | .05 |
| Work commitment |  | -.01 | .05 |  | -.02 | .05 |  | -.05 | .05 |
| Group memberships |  |  |  |  | .12*** | .03 |  | .11*** | .03 |
| Work commitment × Group memberships |  |  |  |  | .00 | .03 |  | -.01 | .03 |
| Education level |  |  |  |  |  |  |  | -.04 | .04 |
| Household income |  |  |  |  |  |  |  | .01 | .02 |
| Gender |  |  |  |  |  |  |  | .19^ | .11 |
| Years from retirement |  |  |  |  |  |  |  | -.00 | .01 |
| Self-esteem |  |  |  |  |  |  |  | .24*** | .04 |
|  |  |  | |  |  | |  |  | |
| *R*2 |  | .00 | |  | .08 | |  | .20 | |
| F for Δ*R*2 |  | 0.07 | |  | 9.30*** | |  | 6.27*** | |
| *Note. ***p < .001, **p <.01, *p <.05, ^p <.10* | | | | | | | | | |

## Studies 1 and 3: Exploratory Analysis

The mean identity change experienced by retirees post-retirement (Study 3) was notably less positive than anticipated by older workers pre-retirement (Study 1). To understand the specific domains of difference, we performed an exploratory MANOVAbetween Study 1 pre-retirement and Study 3 post-retirement groups across the five life domains central to identity: social circle, appearance, goals for future, values and beliefs and activities and hobbies. Our analysis showed that overall, the changes to identity experienced by retirees were significantly less positive than anticipated by older workers, Pillai’s Trace = .11, *F*(5, 720) = 18.55, *p* < .001. This was the case for almost all aspects of identity, with only values and beliefs not differing significantly between pre- and post-retirement groups (see Table S16).

**Table S16.**

*Univariate effects between identity change anticipated pre-retirement (Study 1, n = 511) and experienced post-retirement (Study 3, n = 215).*

|  |  |  |  |  |  |  |  | Frequency % | | |  | 95% Confidence Interval | |
| --- | --- | --- | --- | --- | --- | --- | --- | --- | --- | --- | --- | --- | --- |
| Variable | *df* | *df*  error | *F* | *d* | Study | Mean |  | Positive | Negative | No Change |  | Lower Bound | Upper Bound |
|  |  |  |  |  |  |  |  |  |  |  |  |  |  |
| Appearance | 1 | 724 | 42.38*** | 0.48 | 1. Pre-Retirement | 0.19 |  | 39% | 27% | 34% |  | .10 | .28 |
| 3. Post-Retirement | -0.35 |  | 25% | 57% | 18% |  | -.48 | -.21 |
| Social Circle | 1 | 724 | 46.51** | 0.51 | 1. Pre-Retirement | 0.58 |  | 69% | 12% | 19% |  | .48 | .67 |
| 3. Post-Retirement | -0.02 |  | 41% | 38% | 21% |  | -.16 | .13 |
| Goals for Future | 1 | 724 | 8.77*** | 0.22 | 1. Pre-Retirement | 1.13 |  | 84% | 5% | 11% |  | 1.04 | 1.22 |
| 3. Post-Retirement | 0.88 |  | 77% | 9% | 14% |  | .74 | 1.02 |
| Values/Beliefs | 1 | 724 | 1.63 | 0.09 | 1. Pre-Retirement | 0.63 |  | 62% | 4% | 34% |  | .55 | .70 |
| 3. Post-Retirement | 0.72 |  | 66% | 8% | 26% |  | .60 | .84 |
| Activities/Hobbies | 1 | 724 | 22.24*** | 0.35 | 1. Pre-Retirement | 1.64 |  | 92% | 6% | 2% |  | 1.55 | 1.72 |
| 3. Post-Retirement | 1.26 |  | 86% | 8% | 6% |  | 1.13 | 1.39 |
| Total | 1 | 724 | 32.71*** | 0.43 | 1. Pre-Retirement | 0.83 |  | 92% | 5% | 3% |  | .77 | .89 |
|  |  |  |  |  | 3. Post-Retirement | 0.50 |  | 80% | 19% | 1% |  | .40 | .59 |
|  |  |  |  |  |  |  |  |  |  |  |  |  |  |
| *Note.* ****p* < .001, ***p* < .01 | | | | | | | | | | | | | |

## Studies 1-3: Preliminary Analysis Pre-Regression

### Study 1:

The below represents preliminary analysis that support the regression model (see analytical strategy) presented in the main manuscript.

***Normality.*** A P-P plot with the predicted values on the X-axis and the residual values on the Y-Axis showed that the values of the residuals followed a normality line without drastic deviations, and were normally distributed (see Figure S2a).

***Multicollinearity.*** Correlations table (see main manuscript) showed none of the IVs had a correlation greater than *r* = .34, which suggests the predictors are not too highly correlated. Further, a collinearity statistic showed that VIF scores were all well below 10 (Education was the highest at 1.21) and tolerance scores all well above 0.2 (Education at .83 was also lowest).

***Independent Residuals.*** A Durbin-Watson test was used to test the assumption that our residuals were independent (uncorrelated), the value of 1.92 suggests an assumption of independence was met.

***Homoscedasticity.*** A scatterplot of residuals did not show an obvious pattern, and points were equally distributed above and below the zero line on both axes, suggesting the variation in the residuals was similar at each point of the model (see Figure S2b).

***Outliers.*** Outliers were not removed from our data and we did not pre-register outlier removal criteria. A test of Cook’s Distance for each participant did not reveal any significant outliers that may have unduly influenced our analytical model.

**Figure S2.**

*Left, Normal Probability Plot (a) showing he values of the residuals followed a normality line without drastic deviations. Right, Scatterplot (b) of residuals does not show an obvious pattern.*


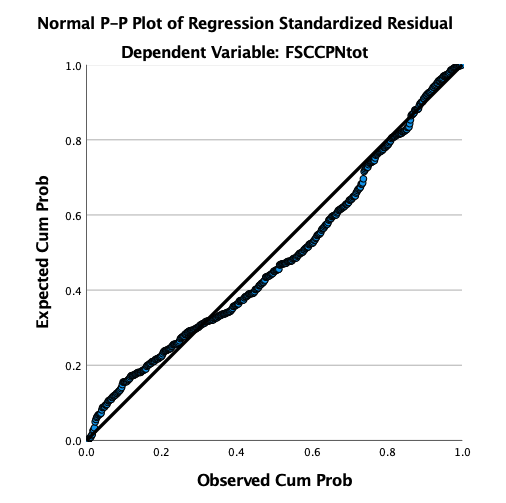

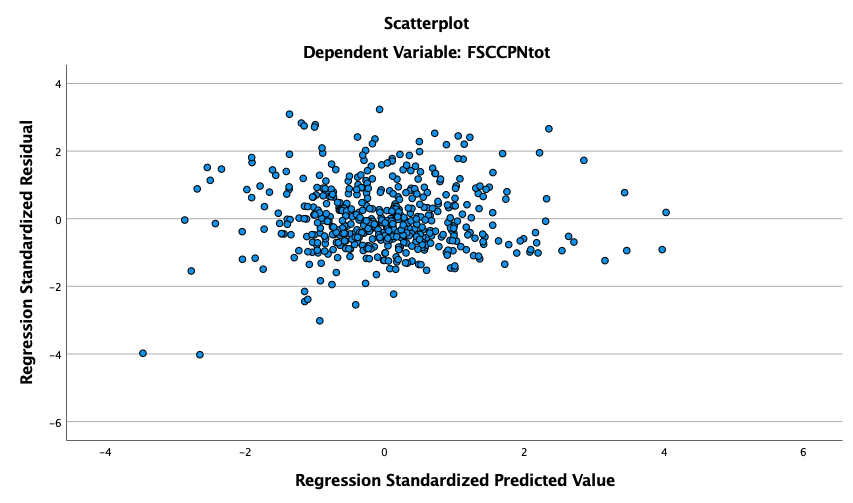


### Study 2:

The below represents preliminary analysis that support the regression model (see analytical strategy) presented in the main manuscript.

***Normality.*** A P-P plot with the predicted values on the X-axis and the residual values on the Y-Axis showed that the values of the residuals followed a normality line without drastic deviations, and were normally distributed (see Figure S3a).

***Multicollinearity.*** Correlations table (see main manuscript) showed none of the IVs had a correlation greater than *r* = .36, which suggests the predictors are not too highly correlated. Further, a collinearity statistic showed that VIF scores were all well below 10 (Social Groups was the highest at 2.27) and tolerance scores all well above 0.2 (Social Groups at .40 was also lowest).

***Independent Residuals.*** A Durbin-Watson test was used to test the assumption that our residuals were independent (uncorrelated), the value of 2.08 suggests an assumption of independence was met.

***Homoscedasticity.*** A scatterplot of residuals did not show an obvious pattern, and points were equally distributed above and below the zero line on both axes, suggesting the variation in the residuals was similar at each point of the model (see Figure S3b).

***Outliers.*** Outliers were not removed from our data and we did not pre-register outlier removal criteria. A test of Cook’s Distance for each participant did not reveal any significant outliers that may have unduly influenced our analytical model.

**Figure S3.**

*Left, Normal Probability Plot (a) showing he values of the residuals followed a normality line without drastic deviations. Right, Scatterplot (b) of residuals does not show an obvious pattern.*


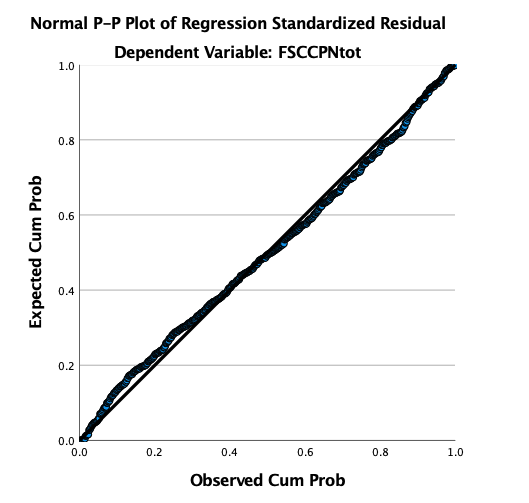

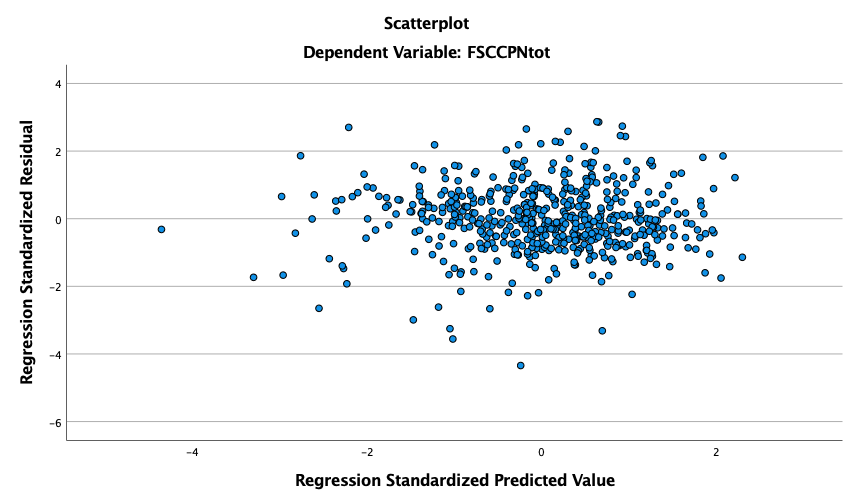


### Study 3:

The below represents preliminary analysis that support the regression model (see analytical strategy) presented in the main manuscript.

***Normality.*** A P-P plot with the predicted values on the X-axis and the residual values on the Y-Axis showed that the values of the residuals followed a normality line without drastic deviations, and were normally distributed (see Figure S4a).

***Multicollinearity.*** Correlations table (see main manuscript) showed none of the IVs had a correlation greater than *r* = .35, which suggests the predictors are not too highly correlated. Further, a collinearity statistic showed that VIF scores were all well below 10 (Income was the highest at 1.19) and tolerance scores all well above 0.2 (Social Groups at .81 was also lowest).

***Independent Residuals.*** As above, a Durbin-Watson test with the value of 1.76 suggests an assumption of independence was met.

***Homoscedasticity.*** A scatterplot of residuals did not show an obvious pattern, and points were equally distributed above and below the zero line on both axes, suggesting the variation in the residuals was similar at each point of the model (see Figure S4b).

***Outliers.*** Outliers were not removed from our data and we did not pre-register outlier removal criteria. Test of Cook’s Distance for each participant did not reveal any significant outliers.

**Figure S3.**

*Left, Normal Probability Plot (a) showing he values of the residuals followed a normality line without drastic deviations. Right, Scatterplot (b) of residuals does not show an obvious pattern.*

*
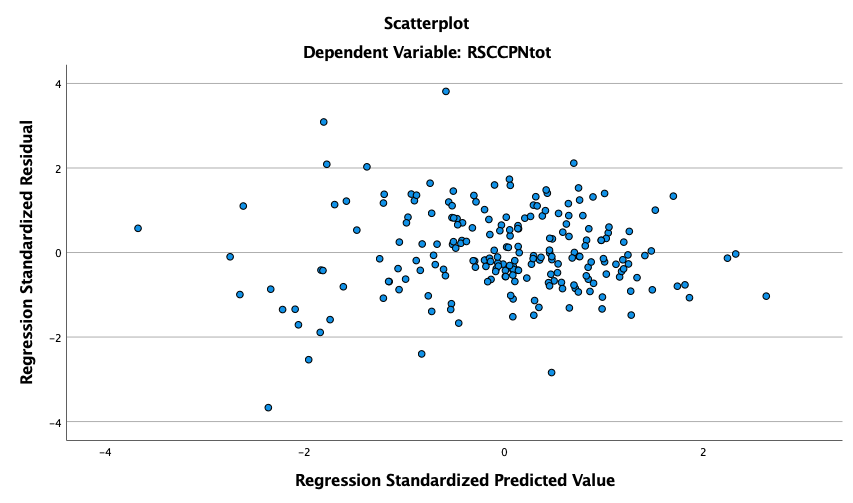

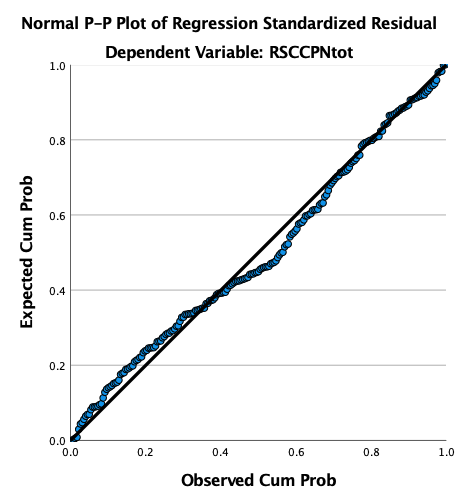
*

## References

Aron, A., & Aron, E. N. (1997). Self-expansion motivation and including other in the self. In *Handbook of personal relationships: Theory, research and interventions*.

Campbell, J. D., Trapnell, P. D., Heine, S. J., Katz, I. M., Lavallee, L. F., & Lehman, D. R. (1996). Self-Concept Clarity: Measurement, Personality Correlates, and Cultural Boundaries. *Journal of Personality and Social Psychology*, *70*(1), 141–156. https://doi.org/10.1037/0022-3514.70.1.141

Jung, H. S., & Yoon, H. H. (2016). What does work meaning to hospitality employees? The effects of meaningful work on employees’ organizational commitment: The mediating role of job engagement. *International Journal of Hospitality Management*, *53*, 59–68. https://doi.org/10.1016/J.IJHM.2015.12.004

Kanungo, R. N. (1982). Measurement of Job and Work Involvement. *Journal of Applied Psychology*, *67*(3), 341–349. [https://doi.org/10.1037/0021-9010.67.3.341](https://psycnet.apa.org/doi/10.1037/0021-9010.67.3.341)

Light, A. E., & Visser, P. S. (2013). The Ins and Outs of the Self: Contrasting Role Exits and Role Entries as Predictors of Self-concept Clarity. *Self and Identity*, *12*(3), 291–306. https://doi.org/10.1080/15298868.2012.667914

McIntyre, K. P., Mattingly, B. A., Lewandowski, G. W., & Simpson, A. (2014). Workplace Self-Expansion: Implications for Job Satisfaction, Commitment, Self-Concept Clarity, and Self-Esteem Among the Employed and Unemployed. *Basic and Applied Social Psychology*, *36*(1), 59–69. https://doi.org/10.1080/01973533.2013.856788

Meyer, J. P., & Allen, N. J. (1984). Testing the Side-Bet Theory of Organizational Commitment: Some Methodological Considerations. *Journal of Applied Psychology*, *69*, 372–378. <https://doi.org/10.1037/0021-9010.69.3.372>

Slotter, E. B., Gardner, W. L., & Finkel, E. J. (2010). Who am i without you? the influence of romantic breakup on the self-concept. *Personality and Social Psychology Bulletin*, *36*(2), 147–160. https://doi.org/10.1177/0146167209352250

Slotter, E. B., Winger, L., & Soto, N. (2015). Lost without each other: The influence of group identity loss on the self-concept. *Group Dynamics*, *19*(1), 15–30. https://doi.org/10.1037/gdn0000020

## Measures used

### Self-Concept Change

| When people enter new phases of their lives they may or may not experience changes to various aspects of themselves and their situation. Some changes may be positive, whereas others may be negative.    For the following items, please use the scale provided to indicate how much you might change after retirement, |
| --- |
| 1. My appearance |
| 2. My clothing and style choices |
| 3. The effort I invest in my appearance |
| 4. My concern for my appearance |
| 5. The amount of time I spend with my current social circle |
| 6. The individuals in my social circle |
| 7. The degree to which I depend on others in my social circle |
| 8. The enjoyment I get from interacting with people in my social circle |
| 9. My goals for the future |
| 10. My goals related to my physical health |
| 11. My goals related to my well-being |
| 12. My goals related to helping others |
| 13. The degree to which I appreciate, believe in, and care for others |
| 14. My commitment in terms of loyalty, bravery, and tenacity |
| 15. The degree to which I believe that my actions and intentions affect my reality |
| 16. My religious belief or belief in others, such as that all people should be treated as equal |
| 17. The time I spend or dedicate to my current activities and hobbies |
| 18. The time I spend or dedicate to new activities and hobbies |
| 19. My openness to new experiences and to trying new activities and hobbies |
| 20. The time or resources I have available for new activities and hobbies |

### Work Commitment

| Please indicate to what extent you agree/disagree with the below statements about your career / chosen profession, |
| --- |
| 1. My line of work has a great deal of personal meaning to me |
| 2. I find that my values and the values of my chosen profession are very similar |
| 3. I care about the fate of this profession |
| 4. I am proud to tell others about my line of work |
| Please indicate to what extent you agree/disagree with the below statements about the organisation in which you are working, |
| 1. I don't feel like I belong to my organisation |
| 2. I'm not emotionally attached to my organisation |
| 3. My organisation has personal meaning for me |
| 4. I do not feel like part of my organisation |
| 5. I'd be glad to spend rest of days in my organisation |
| 6. I discuss my organisation with outsiders |
| 7. My organisation's problems are mine too |
| Please indicate to what extent you agree/disagree with the below statements about your job, |
| 1. Most important things for me involve my job |
| 2. My job is only a small part of who I am |
| 3. I'm very much involved personally in my job |
| 4. I live, eat, and breathe my job |
| 5. Most of my interests are centered around my job |
| 6. My ties to my job are very difficult to break |
| 7. I usually feel detached from my job |
| 8. Most of my personal life goals are job-oriented |
| 9. My job is very central to my existence |
| 10. I like to be absorbed in my job most of the time |

### Organizational Commitment

| Please indicate to what extent you agree/disagree with the below statements about the organisation in which you are working, |
| --- |
| 1. I don't feel like I belong to my organisation |
| 2. I'm not emotionally attached to my organisation |
| 3. My organisation has personal meaning for me |
| 4. I do not feel like part of my organisation |
| 5. I'd be glad to spend rest of days in my organisation |
| 6. I discuss my organisation with outsiders |
| 7. My organisation's problems are mine too |

###

### Social Role Identification

| Please indicate if you identify with any of the below social roles by indicating how important this role is to you.   Select the number from 1 (not important at all) to 7 (extremely important) that best describes how important this role is to your identity, |
| --- |
| 1. My role as a spouse or dating partner |
| 2. My role as a parent or custodial parent |
| 3. My role as a grandparent |
| 4. My role as a close friend |
| 5. My role as a worker |
| 6. My role as a caregiver |
| 7. My role as a student |
| 8. My role as a volunteer |
| 9. My role as a pet owner |
| 10. My role as a member of religious group or denomination |
| 11. My role as a member of a club or social organization |

### Group Memberships

Below you will be asked the number of groups to which you belong. These may take the form of leisure or social groups, community groups and work-related groups. 
Please reflect on the groups you belong to and select up to a maximum of five groups for each category,

1. Leisure or social groups (e.g. book clubs, gardening clubs, tennis groups, etc.). Please select the number of leisure or social groups to which you belong.

2. Community groups (e.g. church groups, volunteering, etc.). Please select the number of community groups to which you belong.

3. Work groups (e.g. work teams, professional organisations, alumni, business social groups etc.). Please select the number of work groups to which you belong.

### Self-esteem

| Please indicate to what extent you agree/disagree with the below statements, |
| --- |
| 1. On the whole, I am satisfied with myself |
| 2. At times I think I am no good at all |
| 3. I feel that I have a number of good qualities |
| 4. I am able to do things as well as most other people |
| 5. I feel I do not have much to be proud of |
| 6. I certainly feel useless at times |
| 7. I feel that I'm a person of worth |
| 8. I wish I could have more respect for myself |
| 9. All in all, I am inclined to think that I am a failure |
| 10. I take a positive attitude toward myself |

###

### Self-concept clarity

Please indicate to what extent you agree/disagree with the below statements,

1. My beliefs about myself often conflict with one another

2. On one day I might have one opinion of myself and on another day I might have a different opinion

3. I spend a lot of time wondering about what kind of person I really am

4. Sometimes I feel that I am not really the person that I appear to be

5. When I think about the kind of person I have been in the past, I'm not sure what I was really like

6. I seldom experience conflict between the different aspects of my personality

7. Sometimes I think I know other people better than I know myself

8. My beliefs about myself seem to change very frequently

9. If I were asked to describe my personality, my description might end up being different from one day to another day

10. Even if I wanted to, I don't think I could tell someone what I'm really like

11. In general, I have a clear sense of who I am and what I am

12. It is often hard for me to make up my mind about things because I don't really know what I want

### Opportunity for Self-Expansion in Retirement

| Please answer each of the following questions according to how you feel about your retirement, |
| --- |
| 1. Retirement will result in having new experiences |
| 2. Retirement will bring you greater awareness |
| 3. Retirement will increase your ability to accomplish new things |
| 4. Retirement will make you more appealing to others |
| 5. Retirement will expand your sense of the kind of person you are |
| 6. Retirement will allow you to expand your own capabilities |
| 7. Do you often learn new things about your retirement? |
| 8. Retirement will be a source of exciting experiences |
| 9. Retirement will allow you to compensate for some of your own weaknesses as a person |
| 10. Retirement will allow you to have a larger perspective on things |
| 11. Retirement will result in you learning new things |
| 12. Retirement will make you a better person |
| 13. Retirement will increase the respect other people have for you |
| 14. Retirement will increase your knowledge |

## Framing Condition Manipulation (Study 2)

In Study 2 we introduced two framing conditions, with participants assigned to either a work exit condition or a retirement entry condition. Below provides the text used in each framing condition (see manipulation check in the submitted manuscript).

**Both Conditions:**

In the next part of the study we would like to ask you to reflect on how you anticipate experiencing your transition into retirement.

**Exit Condition:**

When people **exit different phases of their lives** they often **experience losses** to different aspects of themselves. 
Please take a moment to identify **3 things in your life that you expect to lose** when you stop working that will have a **significant impact on your everyday life**,

- 1. ________________________________________________
- 2. ________________________________________________
- 3. ________________________________________________

**Entry Condition:**

When people **enter different phases of their lives** they often **experience gains** to different aspects of themselves. 
Please take a moment to identify 3 things in your life that you expect to gain when you retire that will have a significant impact on your everyday life,

- 1. ________________________________________________
- 2. ________________________________________________
- 3. ________________________________________________

1. See section ‘Studies 1-3: Work Commitment’ p.37 for additional tests using this measure. [↑](#footnote-ref-1)
2. Note that Step 1 of Table S7 is the same as in table S5 as both show the results for Hypothesis 3, prior to the introduction of Hypothesis 4 predictors, (i) social role identification or (ii) group memberships. [↑](#footnote-ref-2)
3. Table S6, Step 1 has been reproduced here, and can be found in Study 3 of the submitted manuscript for predicting experienced identity (self-concept) from organizational commitment prior to retirement. [↑](#footnote-ref-3)
